# Supplementary material
Source: bioRxiv or medRxiv preprint supplement (https://medrxiv.org/highwire/filestream/93539/field_highwire_adjunct_files/0/2020.08.16.20176107-1.pdf)

SUPPLEMENTAL DATA

**Table S1. Job Role Classifier, Odds Ratios and 95% Confidence Intervals (in descending order)**

| Role                     | Seroprevalence  | Reference Set    | Odds Ratio (95% CI) |
|--------------------------|-----------------|------------------|---------------------|
| Housekeeper              | 8.03% (11/137)  | 2.46% (241/9800) | 3.17 (1.59-5.71)    |
| Radiologist              | 7.27% (4/55)    | 2.51% (248/9882) | 3.09 (0.93-7.69)    |
| Medical Assistant        | 3.09% (21/680)  | 2.50% (231/9257) | 1.41 (0.86-2.18)    |
| Pharmacist               | 3.25% (5/154)   | 2.52% (247/9783) | 1.34 (0.47-2.96)    |
| Social Work              | 3.4% (8/235)    | 2.51% (244/9702) | 1.29 (0.58-2.47)    |
| Clerical, administrative | 3.15% (25/793)  | 2.48% (227/9144) | 1.27 (0.81-1.90)    |
| Physician                | 3.12% (32/1026) | 2.47% (220/8911) | 1.21 (0.81-1.75)    |
| Management, director     | 3.11% (8/257)   | 2.52% (244/9680) | 1.14 (0.51-2.19)    |
| Surgeon                  | 2.66% (8/301)   | 2.53% (244/9636) | 0.97 (0.43-1.89)    |
| Nursing                  | 2.34% (82/3504) | 2.64% (170/6433) | 0.90 (0.68-1.18)    |
| Technician               | 1.98% (25/1260) | 2.62% (227/8677) | 0.77 (0.49-1.15)    |
| Respiratory              | 2.06% (2/97)    | 2.54% (250/9840) | 0.74 (0.12-2.37)    |
| Therapist                | 1.78% (11/617)  | 2.59% (241/9320) | 0.69 (0.35-1.21)    |
| Food Service             | 1.77% (2/113)   | 2.54% (250/9824) | 0.64 (0.11-2.04)    |
| Researcher               | 1.45% (1/69)    | 2.54% (251/9868) | 0.62 (0.03-2.82)    |
| NP, PA                   | 1.49% (6/402)   | 2.58% (246/9535) | 0.58 (0.23-1.20)    |
| Facilities, engineer     | 1.16% (1/86)    | 2.55% (251/9851) | 0.40 (0.02-1.83)    |
| Security                 | 0.00% (0/41)    | 2.55% (252/9896) | 0.00 (0.00-36.01)   |
| Anesthesiologist         | 0.00% (0/110)   | 2.56% (252/9827) | 0.00 (0.00-0.26)    |

Notes:

- Only one role classifier assigned per participant.
- Social Work includes case managers and chaplaincy.
- Pharmacist includes pharmacy technicians.
- Medical Assistant includes scribes.
- Physician includes all except surgeon, anesthesiologist, radiologist.
- Nursing includes nurse assistants.
- Respiratory (non-physician) indicates respiratory therapists.
- Therapist includes all other therapists (e.g. PT, OT, Speech, Dietician, Massage, etc . . .).
- NP, PA = nurse practitioner, physician assistant.
- Facilities includes information systems/technology.

Table S2. Workplace Classifier, Odds Ratios and 95% Confidence Intervals (in descending order)

| Workplace           | Seroprevalence  | Reference Set     | Odds Ratio (95% CI) |
|---------------------|-----------------|-------------------|---------------------|
| Research            | 3.09% (3/97)    | 2.48% (292/11757) | 1.30 (0.32-3.49)    |
| ICU                 | 2.77% (22/795)  | 2.47% (273/11059) | 1.16 (0.73-1.76)    |
| Pharmacy            | 2.69% (6/223)   | 2.48% (289/11631) | 1.11 (0.43-2.30)    |
| OR                  | 2.77% (36/1299) | 2.45% (259/10555) | 1.07 (0.74-1.51)    |
| Desk job            | 2.74% (25/913)  | 2.47% (270/10941) | 1.07 (0.68-1.58)    |
| Inpatient wards     | 2.51% (55/2195) | 2.48% (240/9659)  | 1.04 (0.77-1.39)    |
| Radiology           | 2.51% (9/358)   | 2.49% (286/11496) | 1.00 (0.47-1.84)    |
| L&D                 | 2.44% (15/614)  | 2.49% (280/11240) | 0.99 (0.56-1.62)    |
| Outpatient clinic   | 2.47% (70/2836) | 2.50% (225/9018)  | 0.98 (0.74-1.28)    |
| Behavioral Health   | 2.38% (6/252)   | 2.49% (289/11602) | 0.96 (0.37-1.98)    |
| Emergency           | 1.95% (17/870)  | 2.53% (278/10984) | 0.81 (0.47-1.29)    |
| Cardiology          | 1.71% (6/350)   | 2.51% (289/11504) | 0.70 (0.27-1.44)    |
| Rehab               | 1.66% (4/241)   | 2.51% (291/11613) | 0.65 (0.20-1.55)    |
| Pathology           | 1.55% (7/453)   | 2.53% (288/11401) | 0.63 (0.27-1.25)    |
| Pulmonary           | 1.48% (2/135)   | 2.50% (293/11719) | 0.56 (0.09-1.76)    |
| Hospital facilities | 1.16% (1/86)    | 2.50% (294/11768) | 0.40 (0.02-1.85)    |

Notes:

- Participants could designate up to three workplace settings of potential exposure, but only one role (e.g. job role = portable X-ray tech; workplace = ICU, ER, Inpatient Wards).
- The ICU classifier includes all intensive care units, aside from neonatal.
- The OR classifier includes operating rooms, recovery units and all interventional procedure suites (e.g. endoscopy, bronchoscopy, interventional radiology, etc . . ).
- The L&D classifier includes labor & delivery, fetal-maternal, neonatal intensive care, etc . . .
- The Rehab classifier includes wound care and hyperbaric units.
- Hospital facilities applies to engineering, security, information systems/technology.

Figure S1. Providence Oregon Cohort Asymptomatic HCW Serosurveillance by Hospital Test Site

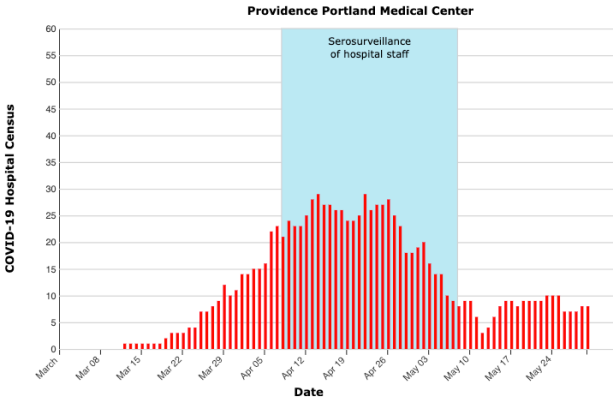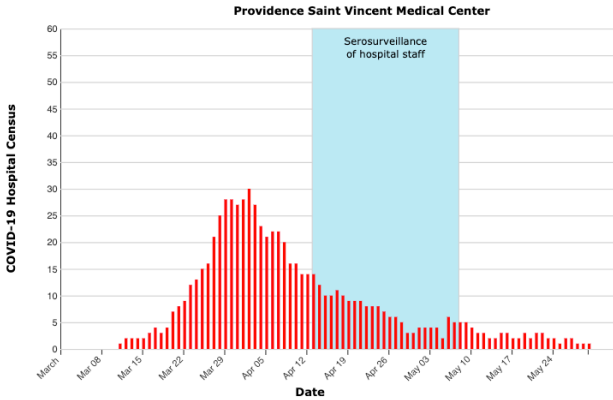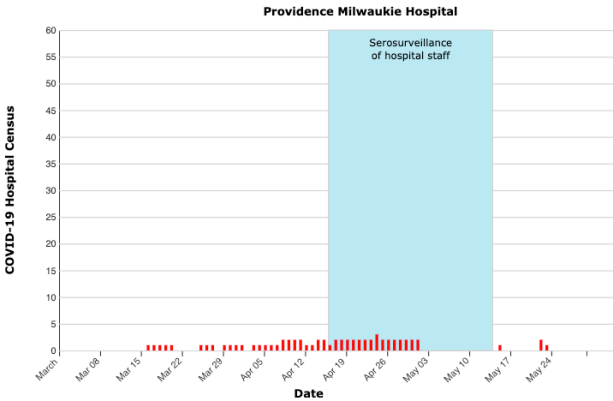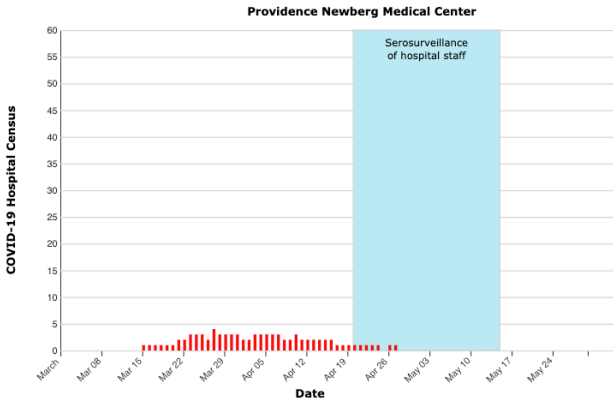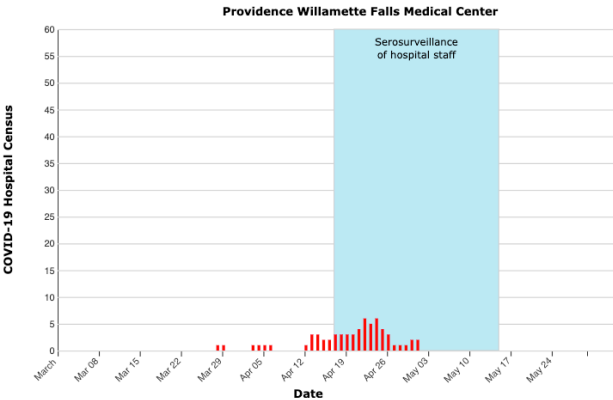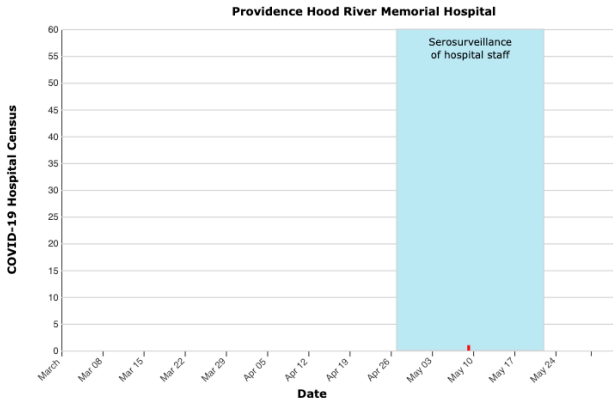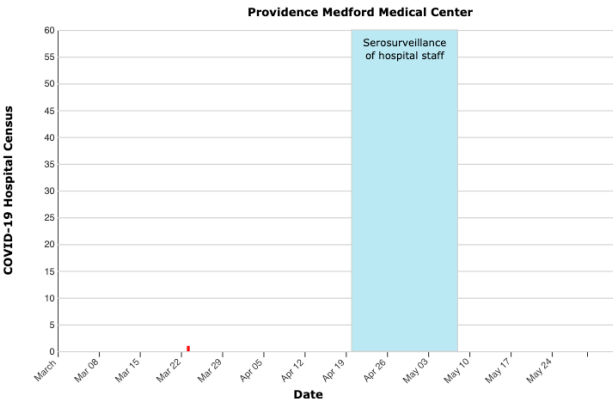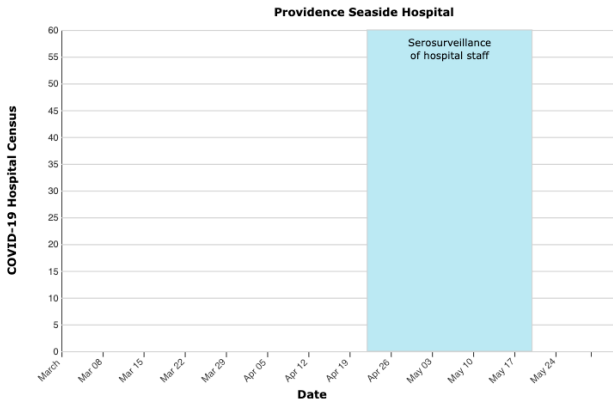

Supplement: Supplementary file [file 2020.08.16.20176107-1.pdf]
